# Supplementary material
Source: PubMed Central journal article supplement (PMC3993085)

## SUPPLEMENTARY ONLINE DATA

### S-palmitoylation regulates biogenesis of core glycosylated wild-type and F508del CFTR in a post-ER compartment

McClure, M.L.<sup>\*,†</sup>, Wen, H.<sup>\*</sup>, Fortenberry, J.<sup>\*</sup>, Hong, J.S.<sup>\*,‡</sup>, Sorscher, E.J.<sup>\*,§,1</sup>

<sup>\*</sup>Gregory Fleming James Cystic Fibrosis Research Center, <sup>†</sup>Department of Genetics, <sup>‡</sup>Department of Cell, Developmental and Integrative Biology, <sup>§</sup>Department of Medicine, University of Alabama at Birmingham, Birmingham, AL 35294, USA

<sup>1</sup>To whom correspondence should be addressed (sorscher@uab.edu).

## FIGURE LEGENDS

### Figure S1 2-BP blunts vectorial chloride (Cl<sup>-</sup>) transport

Transepithelial Cl<sup>-</sup> transport was measured by Ussing chamber analysis for CFBE (A,B) and Calu-3 (C,D) cells grown on permeable supports following treatment with 2-BP (4 h prior to study). Summary bar graphs (B,D) depict the overall effect of forskolin (20 μM) and genistein (50 μM) to activate CFTR. Inh172 (10 μM) is a blocker of CFTR function. Results are shown as mean ± SEM and normalized to control cells. \**P* < 0.05; *n* = 4.

### Figure S2 Immunofluorescence of HeLa wild-type cells in the presence or absence of DHHC-7

Wild-type CFTR was labeled in the absence (column I) and presence (columns II-IV) of overexpressed DHHC-7. CFTR and HA-tagged DHHC-7 were labeled with anti-NBD1 and anti-HA antibodies, respectively. Golgi (top panel IV) or ER (lower panel IV) compartments were detected with CellLight GFP (Molecular Probes). Immunofluorescence identified strong co-localization of wild-type CFTR with DHHC-7 and Golgi markers.

**Figure S1**

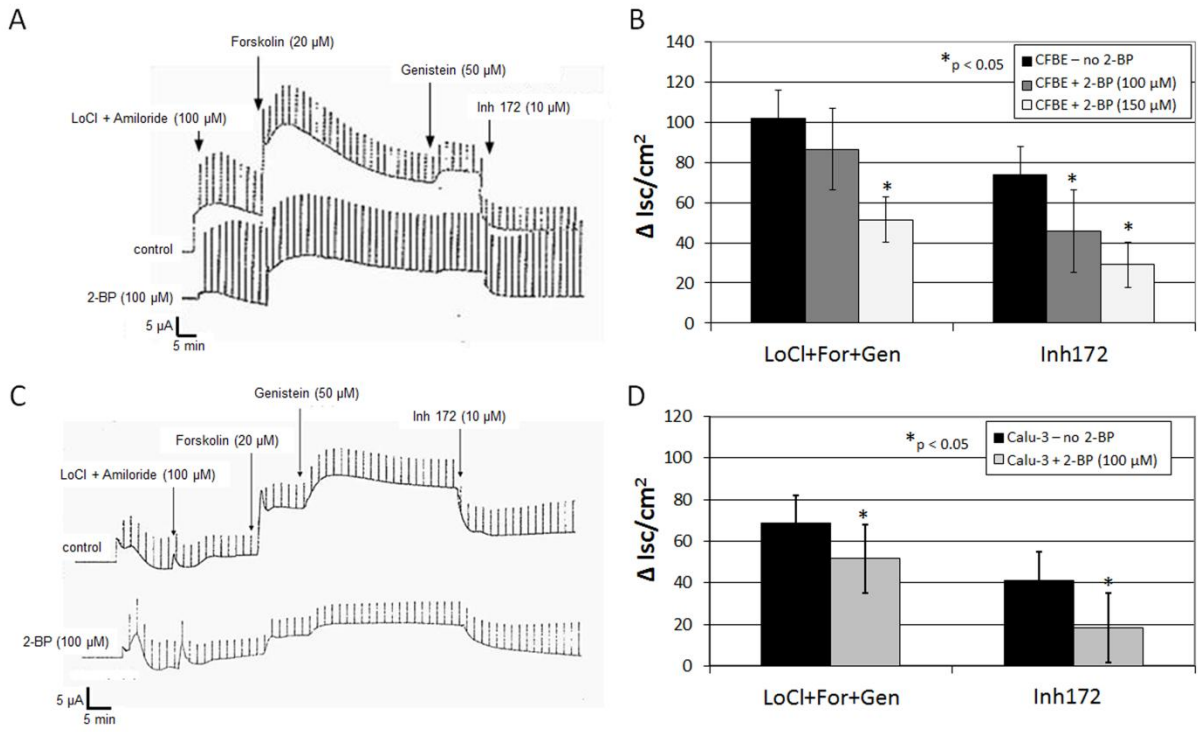

Figure S2

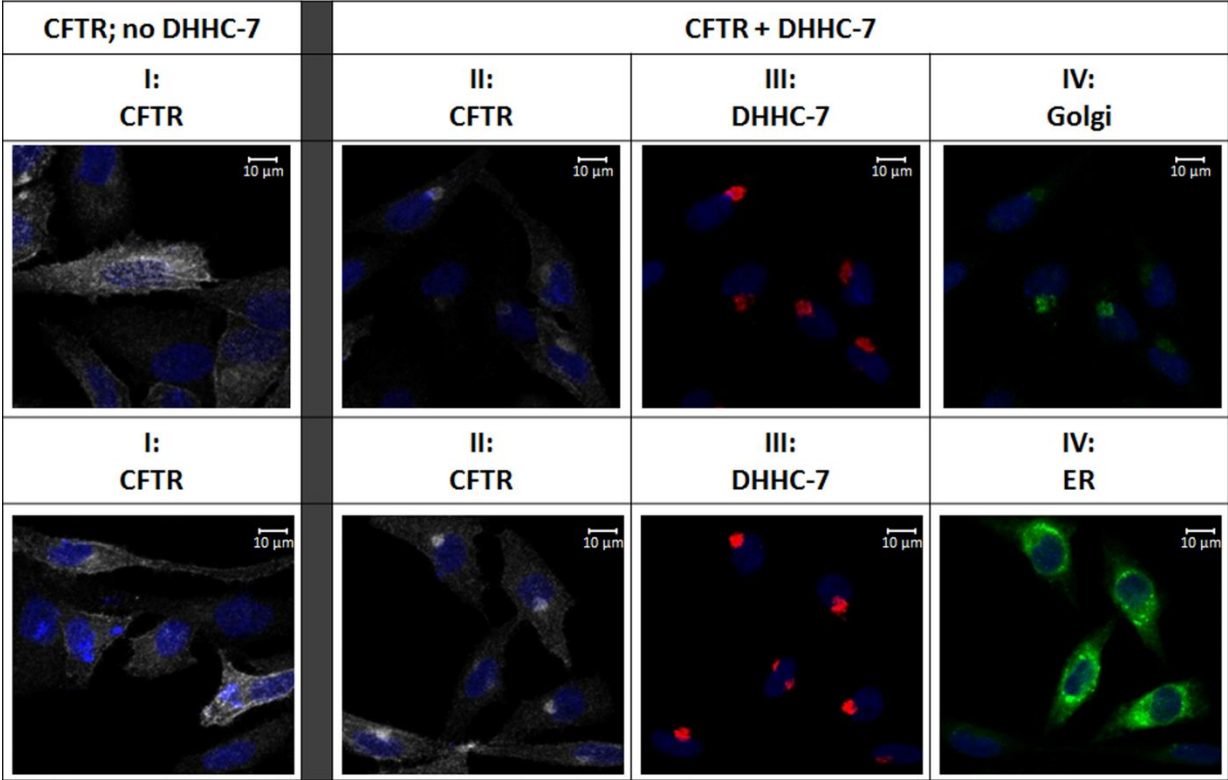

Supplement: NIHMS571850-supplement-Figures_S1_and_S2.pdf [file NIHMS571850-supplement-Figures_S1_and_S2.pdf]
